# Supplementary material
Source: publisher figshare collection journal article supplement (https://acs.figshare.com/ndownloader/files/4601656)
Supplement: Supplementary file 1 [file 4601656]

# Formation of an Unfolding Intermediate State of Soluble Chloride Intracellular Channel Protein CLIC1 at Acidic pH

*Sylvia Fanucchi, Roslin J. Adamson and Heini W. Dirr\**

Protein Structure-Function Research Unit, School of Molecular and Cell Biology, University of the  
Witwatersrand, Johannesburg 2050, South Africa

\* Corresponding author. Tel.: +27 11 7176352; Fax: +27 11 7176351; E-mail: [heinrich.dirr@wits.ac.za](mailto:heinrich.dirr@wits.ac.za)

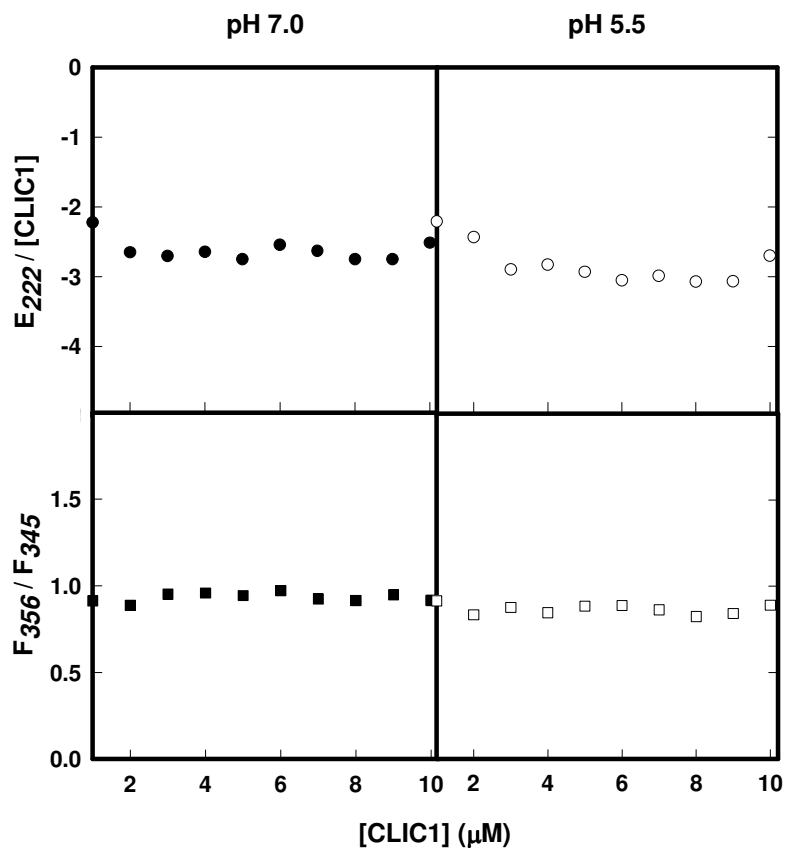

**Figure S1. Protein concentration dependence study**

The CLIC1 concentration dependence of the midpoint of the equilibrium unfolding transition at both pH 7.0 (closed) and pH 5.5 (open). The study was conducted at 20°C using both  $E_{222}$  (●) and the ratio of fluorescence  $F_{356} / F_{345}$  (■) as probes. The concentration of CLIC1 ranged from 1  $\mu\text{M}$  to 10  $\mu\text{M}$ . The buffer used was a 50 mM  $\text{Na}_2\text{HPO}_4$  containing 0.02%  $\text{NaN}_3$ ; 1 mM DTT and 4.8 M urea at pH 7.0 or 3.5 M urea at pH 5.5.

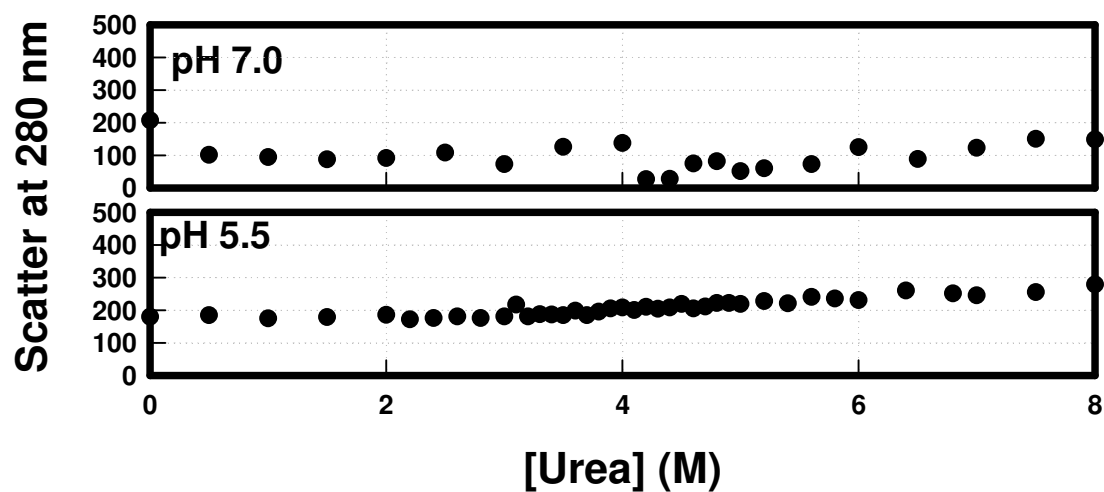

**Figure S2. Raleigh scatter to detect aggregation**

The plots show the scatter produced by 2  $\mu$ M CLIC1 at 280 nm when excited at 280 nm at pH 7 and pH 5.5 in the presence of increasing concentrations of urea. The plots do not show a significant increase in scatter at any point along the unfolding transition which implies the absence of aggregation.

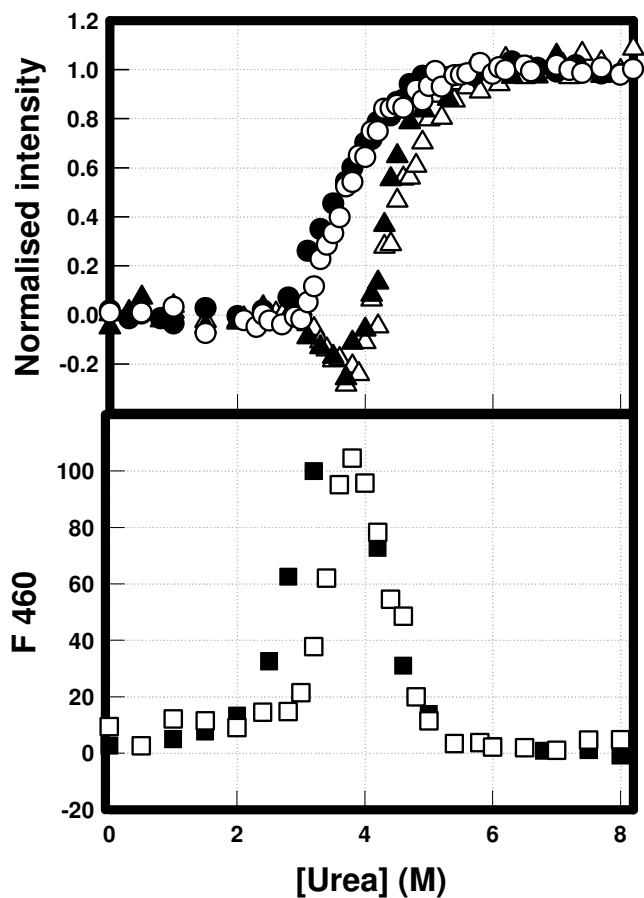

**Figure S3. Comparison of unfolding at pH 7, 37°C and pH 5.5, 20°C**

Comparison of the urea-induced equilibrium unfolding of 2  $\mu$ M CLIC1 at pH 7.0, 37°C (closed) and pH 5.5, 20°C (open). The unfolding was monitored using  $E_{222}$  (●/○),  $\lambda_{max}$  (▲/△) and ANS binding (■/□) as probes.
